# Supplementary material
Source: PubMed Central journal article supplement (PMC7852908)
Supplement: 41422_2020_410_MOESM5_ESM.pdf [file 41422_2020_410_MOESM5_ESM.pdf]

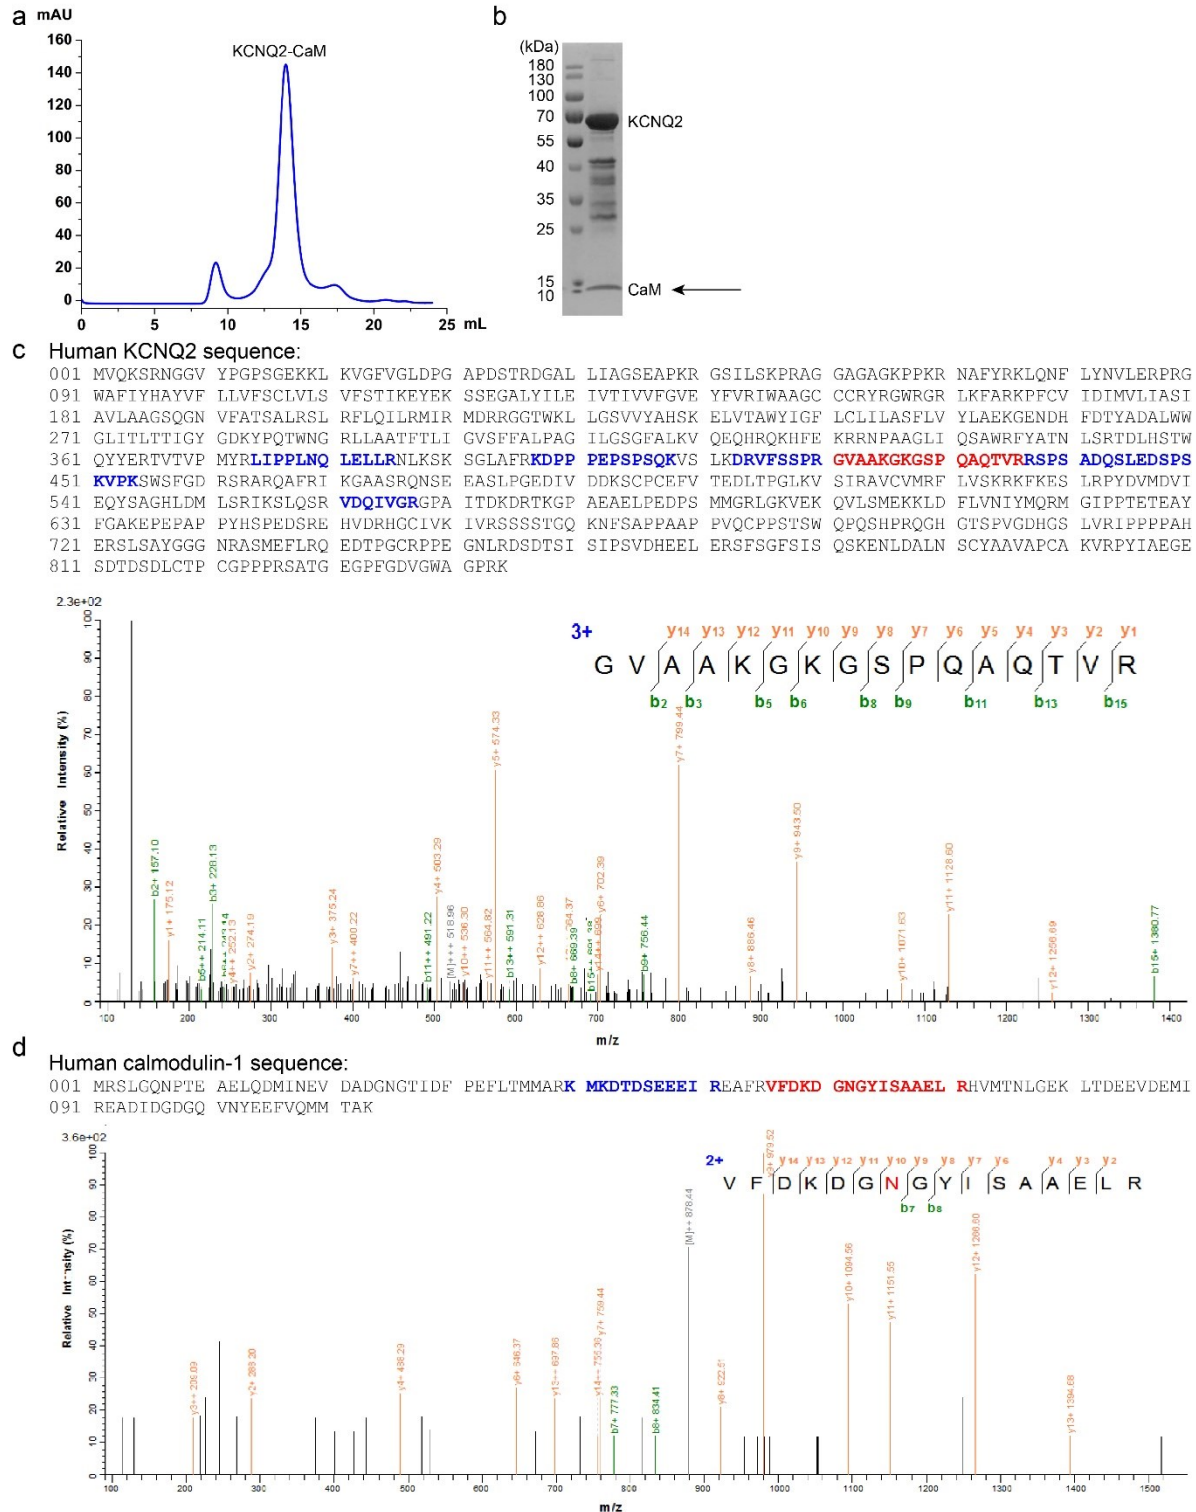

**Fig. S5 Purification and identification of KCNQ2-CaM complex.** **a** Gel filtration of KCNQ2-CaM complex in Superose 6 in GDN detergent. **b** SDS-PAGE of the peak fraction from gel filtration. The arrow indicates the band that was excised and sent for mass spectrometry analysis.

**c** The sequences of KCNQ2 peptides identified by mass spectrometry (red and blue), and an example of the mass spectrum of the peptide marked in red. **d** The sequences of CaM peptides identified by mass spectrometry (red and blue), and an example of the mass spectrum of the peptide marked in red.
