# Supplementary material
Source: PubMed Central journal article supplement (PMC7852908)
Supplement: 41422_2020_410_MOESM7_ESM.pdf [file 41422_2020_410_MOESM7_ESM.pdf]

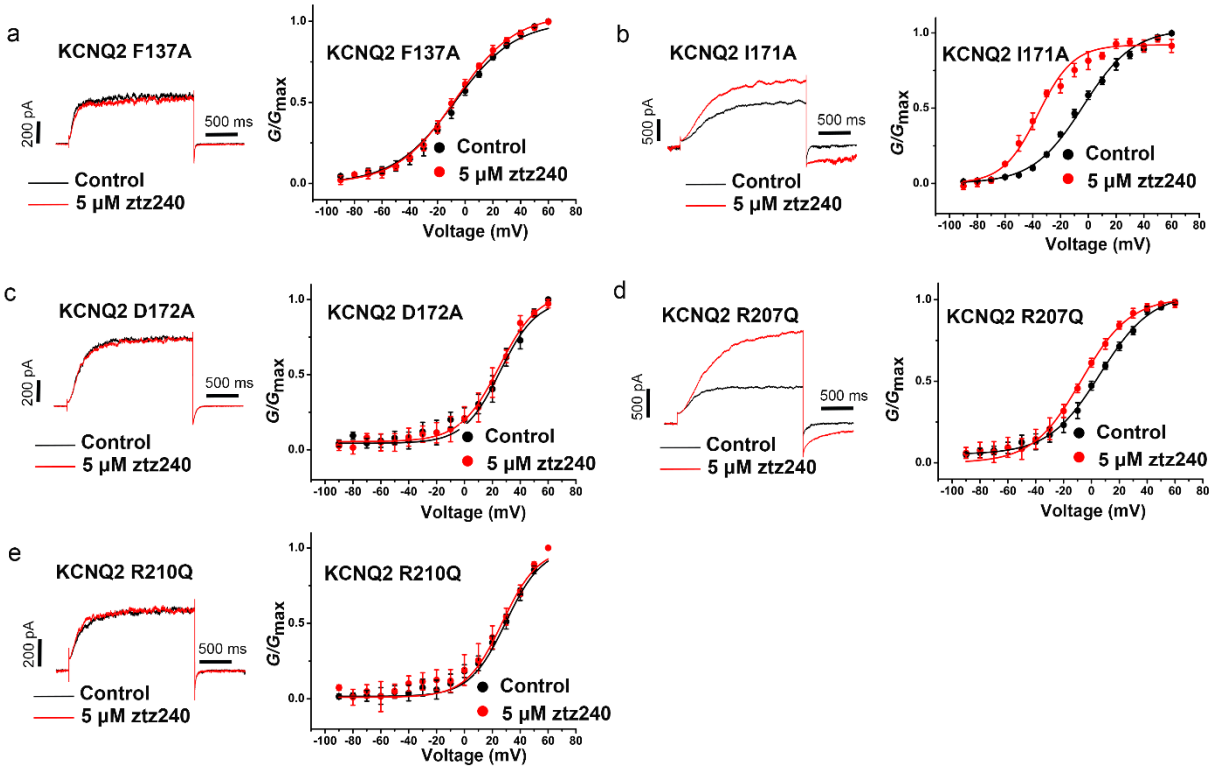

**Fig. S7** Representative traces of mutants F137A, I171A, D172A, R207Q and R210Q in the absence (black) or presence (red) of 5  $\mu$ M ztz240 (left) and corresponding G-V curve (right). The representative traces of the mutants were elicited by depolarization to +50 mV. Data are presented as means  $\pm$  S.E.M ( $n \geq 5$ ).
