# Supplementary material
Source: PubMed Central journal article supplement (PMC7852908)
Supplement: 41422_2020_410_MOESM11_ESM.pdf [file 41422_2020_410_MOESM11_ESM.pdf]

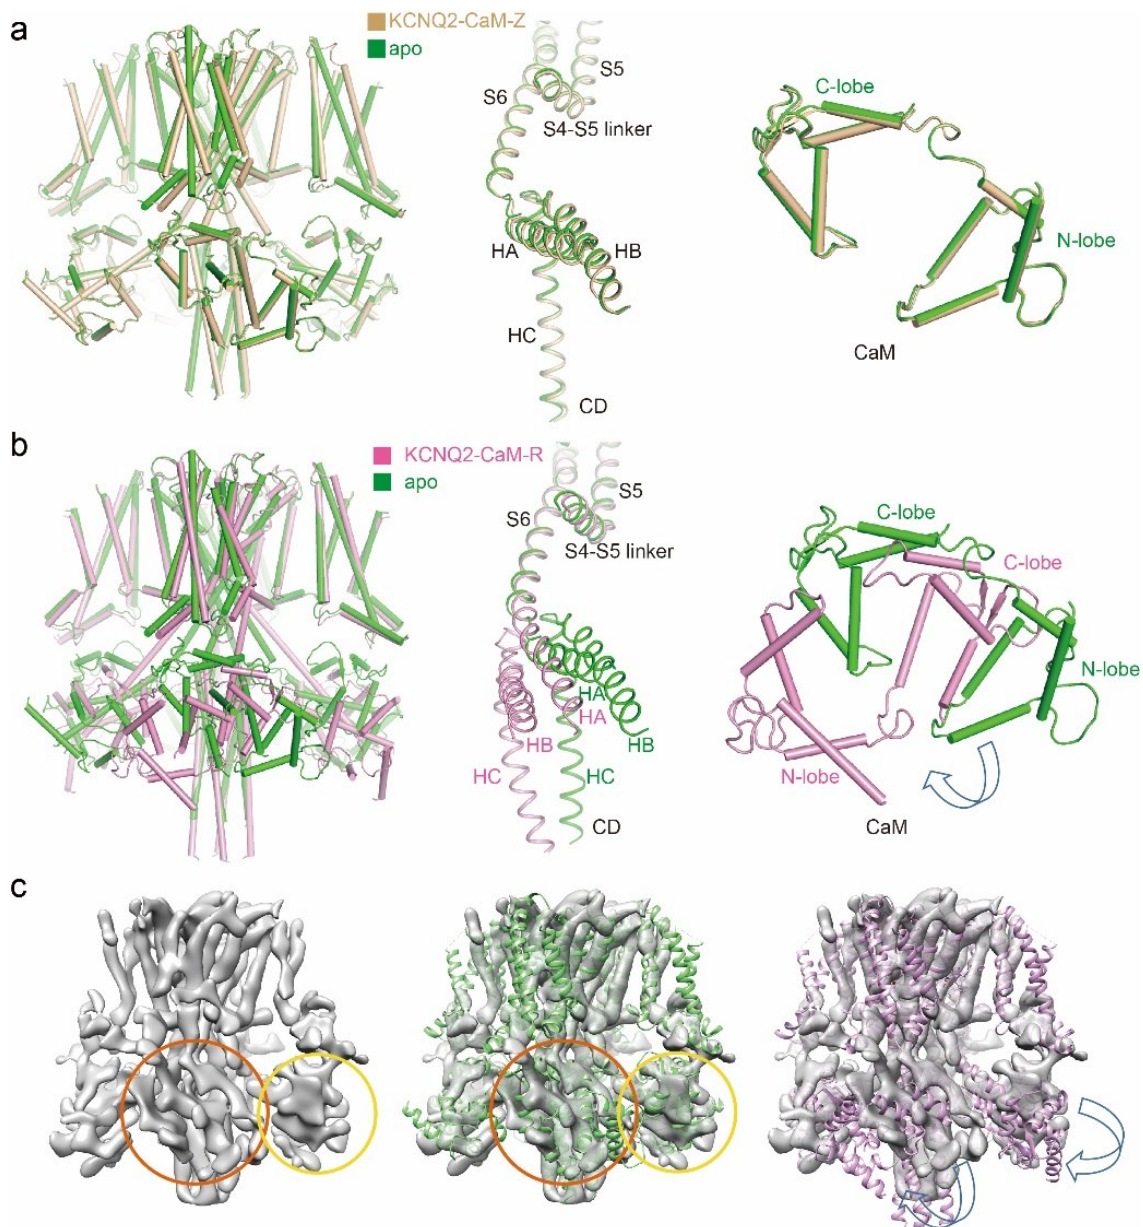

**Fig. S11 Structures of KCNQ2-CaM complex.** **a** Structural alignment of KCNQ2-CaM in apo state and ztz240 bound state (KCNQ2-CaM-Z) and zoom-in views of CD and CaM. **b** Structural alignment of KCNQ2-CaM in apo state and RTG bound state (KCNQ2-CaM-R) and zoom-in views of CD and CaM. **c** Cryo-EM map of KCNQ2-CaM determined in the presence of RTG only (left), and superimposed with apo KCNQ2-CaM structure (green model, middle) or with RTG-bound KCNQ2-CaM-R structure (pink model, right). Orange and yellow circles indicate the CD and CaM densities align well with models in the apo KCNQ2-CaM structure, but not those in KCNQ2-CaM-R structures.
