# Supplementary material
Source: PubMed Central journal article supplement (PMC7852908)
Supplement: 41422_2020_410_MOESM13_ESM.pdf [file 41422_2020_410_MOESM13_ESM.pdf]

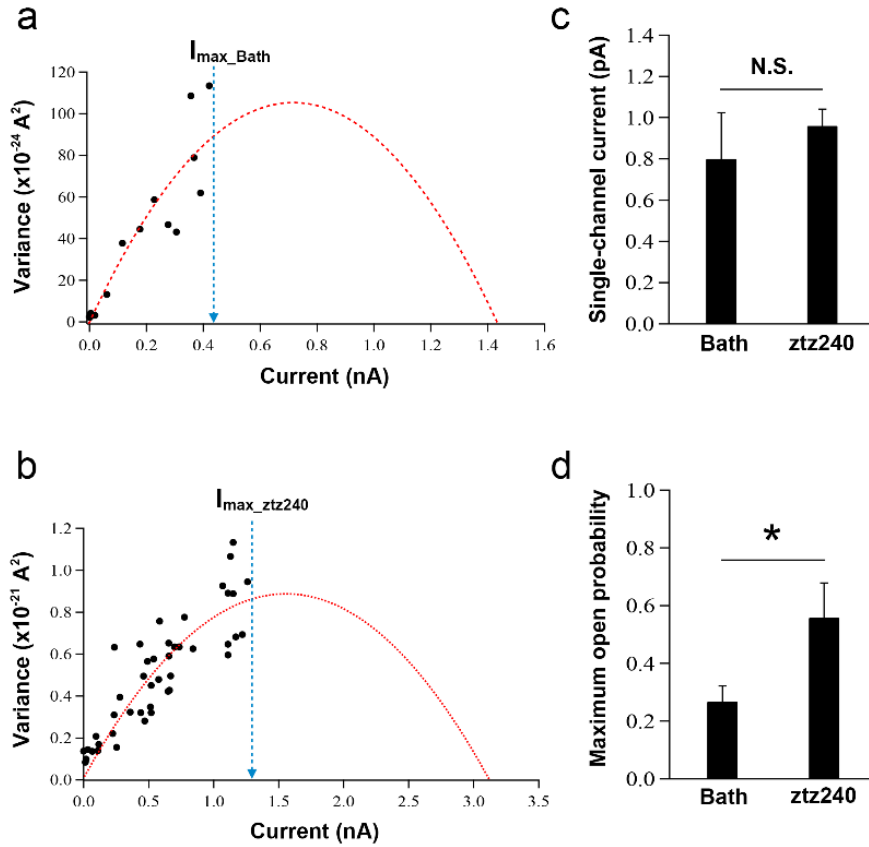

**Fig. S13 Noise analysis for ztz240 activation on KCNQ2.** **a** Current activated by bath solution ( $I_{\text{max\_Bath}}$ ) for control. The maximum open probability ( $P_{o\_max}$ ) is estimated to be  $26.7 \pm 5\%$  ( $n = 5$ ). **b** Current activated by ztz240 at  $10 \mu\text{M}$  (saturating concentration) ( $I_{\text{max\_ztz240}}$ ). The  $P_{o\_max}$  is estimated to be  $55.8 \pm 12.1\%$  ( $n = 5$ ). **c** Histogram indicates that ztz240 had no effect on unitary conductances, calculated from the slope of **(a)** and **(b)**. **d** Histogram shows an increased  $P_{o\_max}$  activated by ztz240.  $P_{o\_max} = I_{\text{max}}/I_{\text{estimate}}$ . Error bars represent mean  $\pm$  SEM ( $n=5$ ).
